# Supplementary material for: Molecular genetic contributions to socioeconomic status and intelligence
Source: PubMed Central journal article supplement (PMC4051988; doi:10.1016/j.intell.2014.02.006), 2014-05

**Full Cohort (n=23,673)**

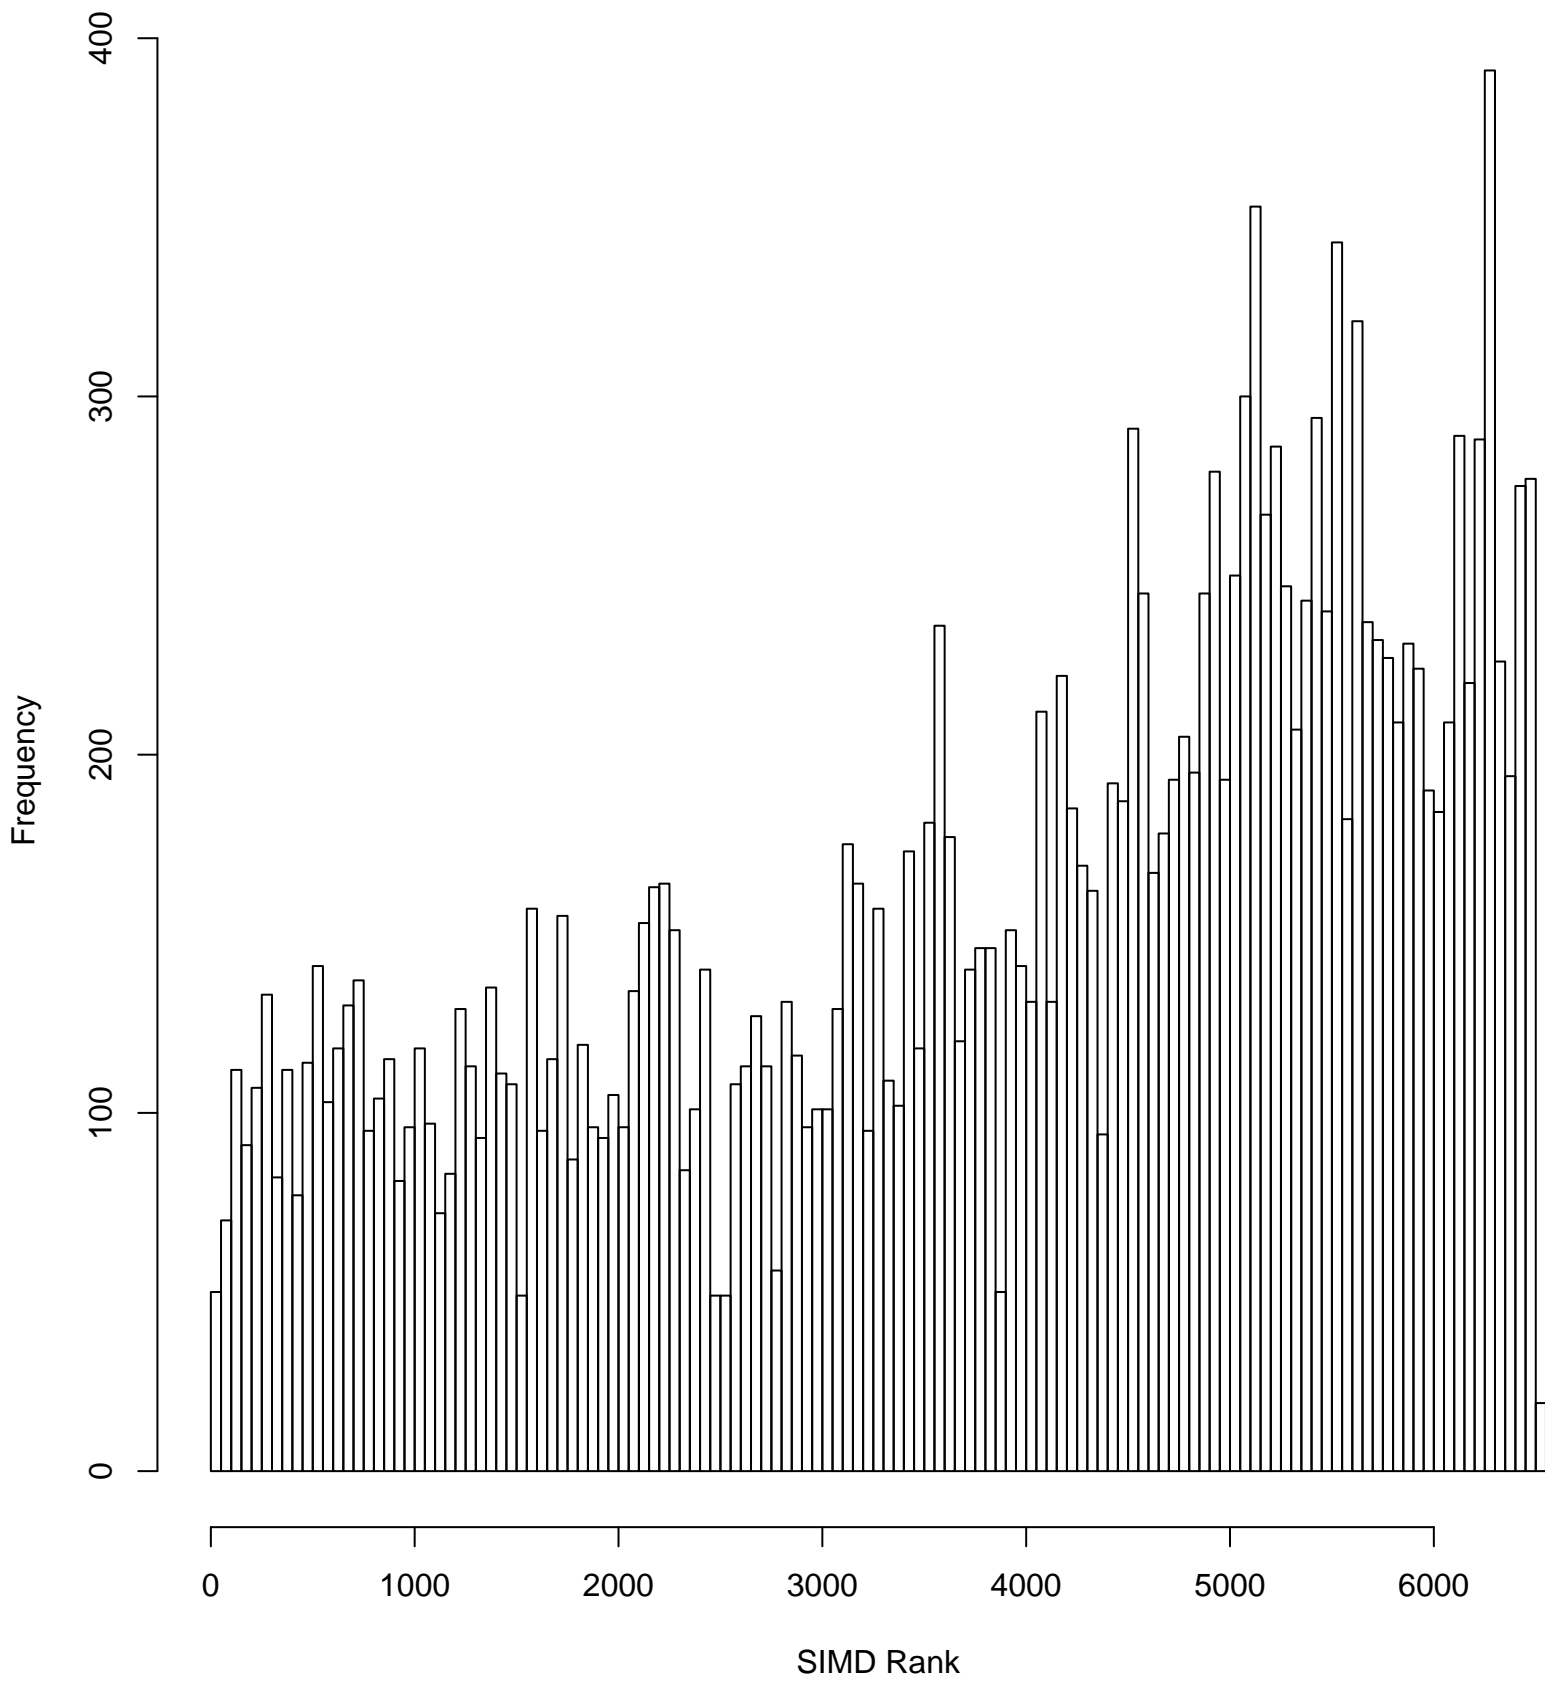

**Unrelated, Gentoyped Cohort (n=6,815)**

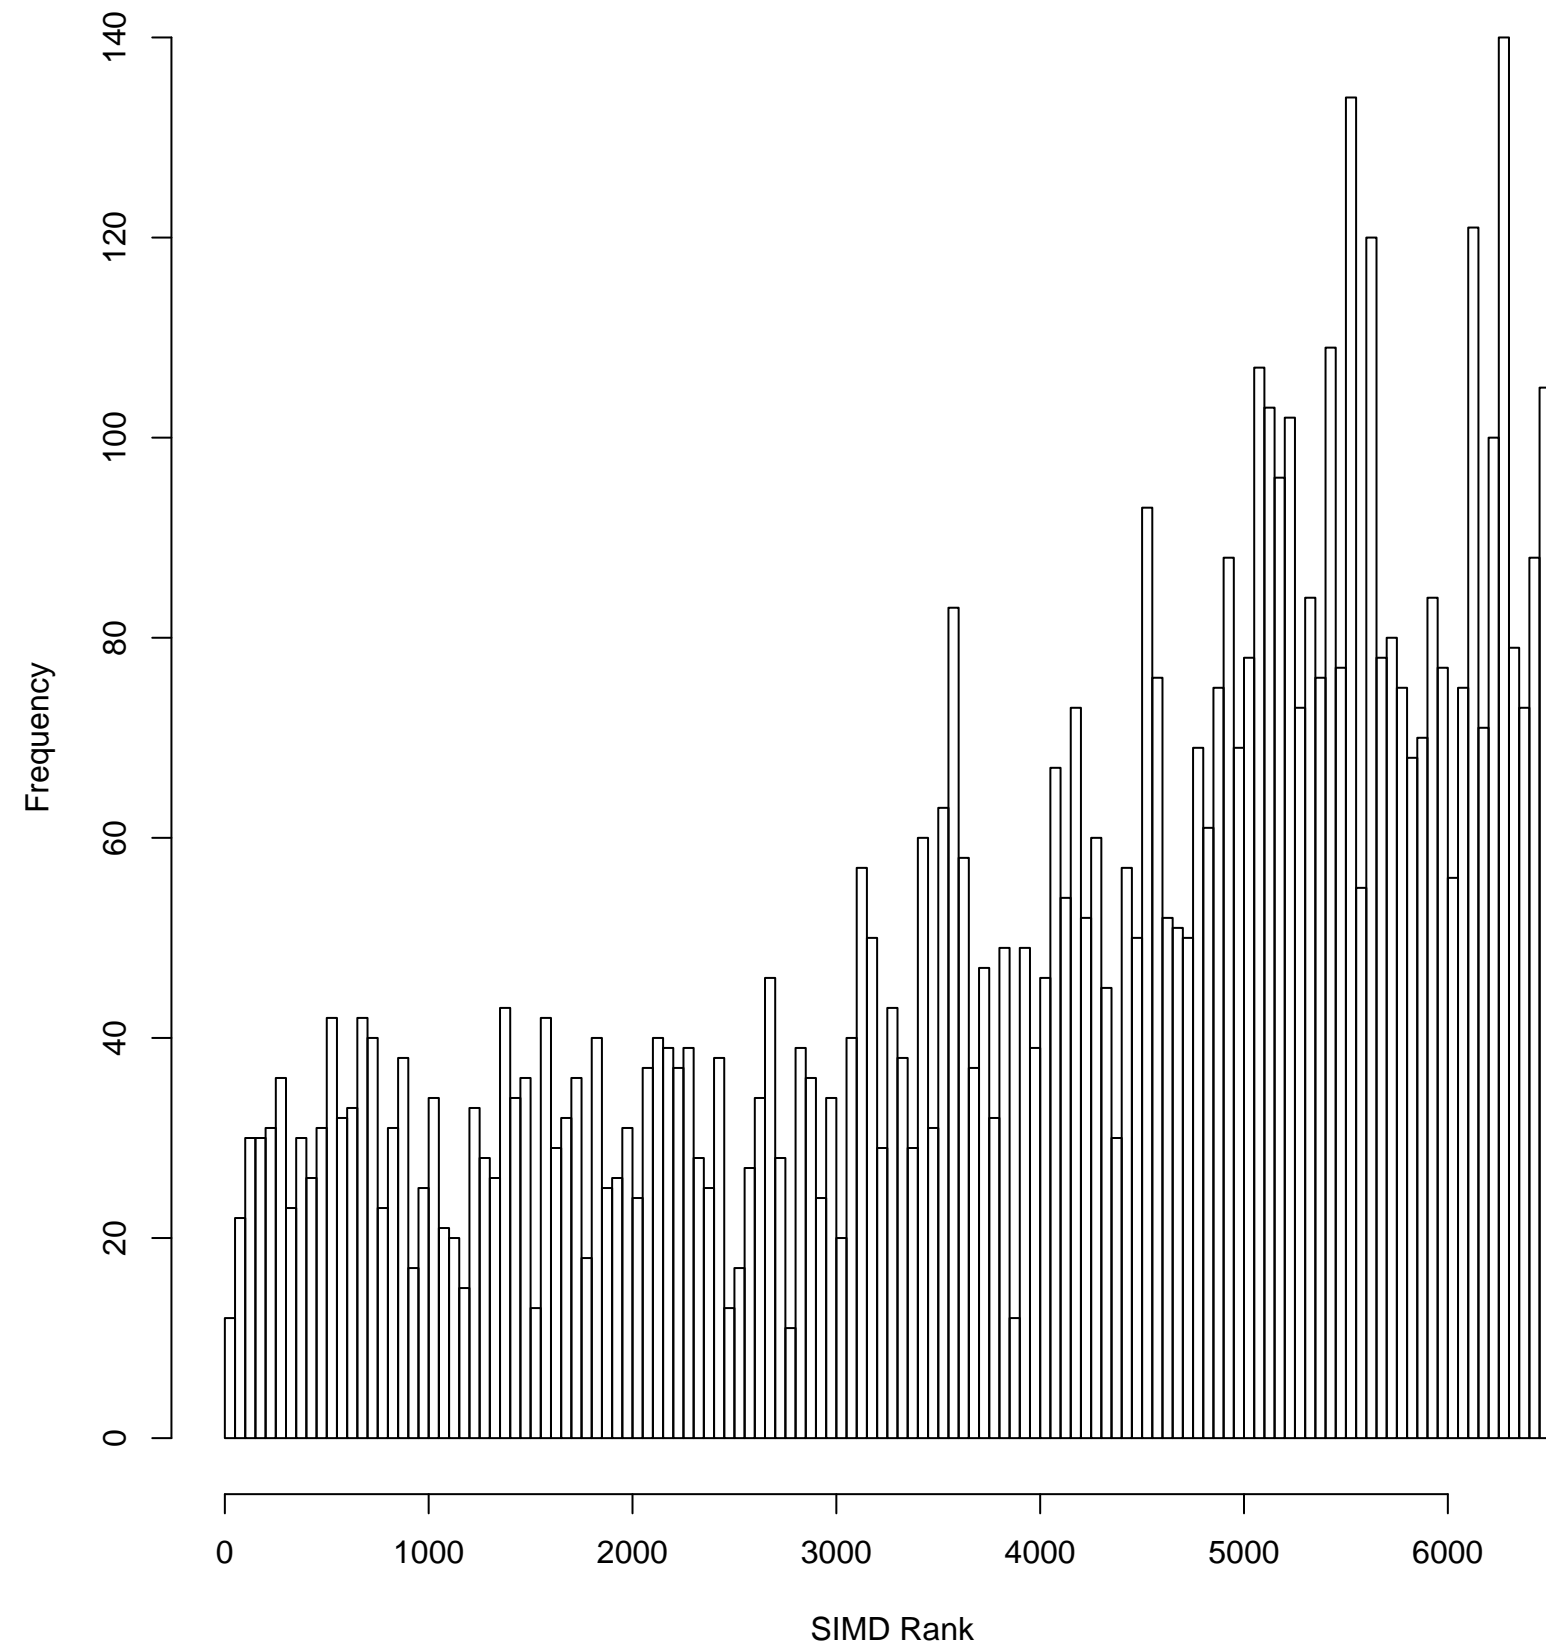

Supplement: mmc1.pdf [file mmc1.pdf]
