# Supplementary material for: Molecular genetic contributions to socioeconomic status and intelligence
Source: PubMed Central journal article supplement (PMC4051988; doi:10.1016/j.intell.2014.02.006), 2014-05

**g**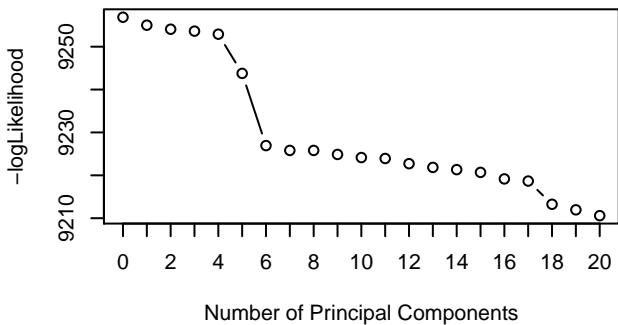**g**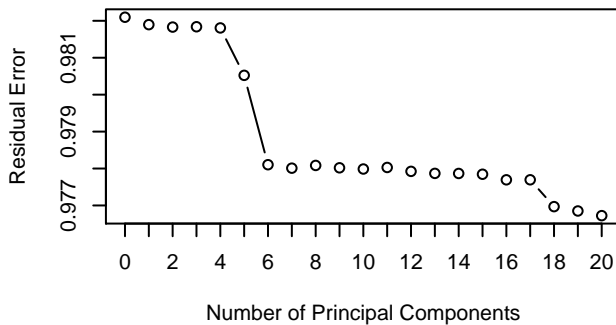**Education**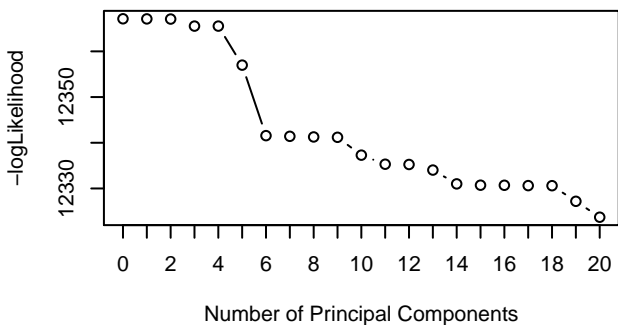**Education**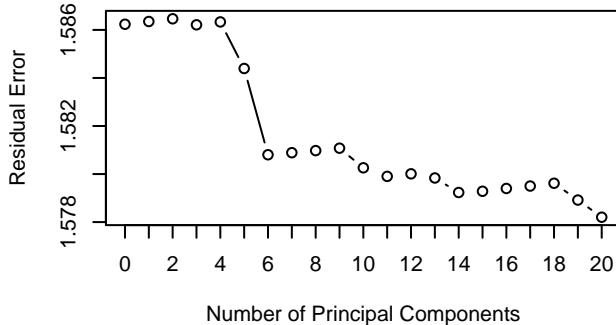**SIMD**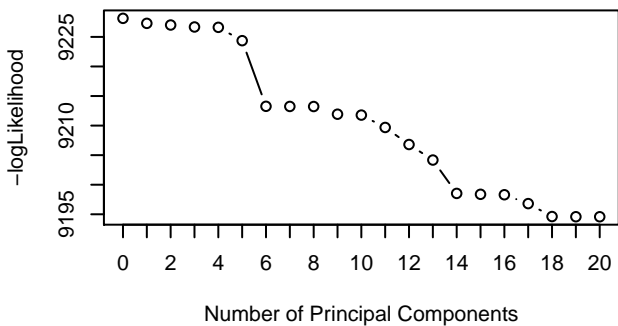**SIMD**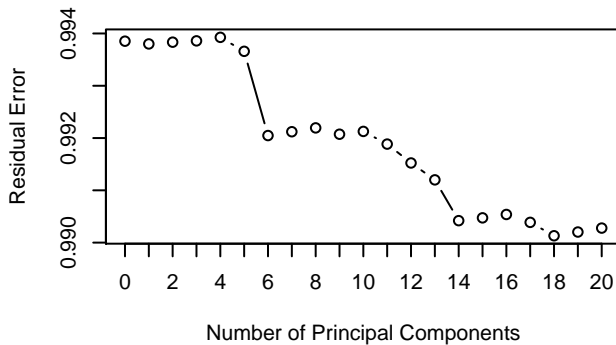

Supplement: mmc2.pdf [file mmc2.pdf]
